# Supplementary material for: Dexamethasone use and Mortality in Hospitalized Patients with Coronavirus Disease 2019: a Multicenter Retrospective Observational Study
Source: bioRxiv or medRxiv preprint supplement (doi:10.1101/2020.10.23.20218172), 2020-10-27
Supplement: Supplementary file [file media-1.pdf]

**eFigure 1. Freedom from the composite endpoint of intubation or death in patients with oxygen or intubation (N=693) (A) and in patients without oxygen or intubation (N=1,043) (B) of hospitalized patients with Covid-19 according to dexamethasone dosage, in the matched sample.**

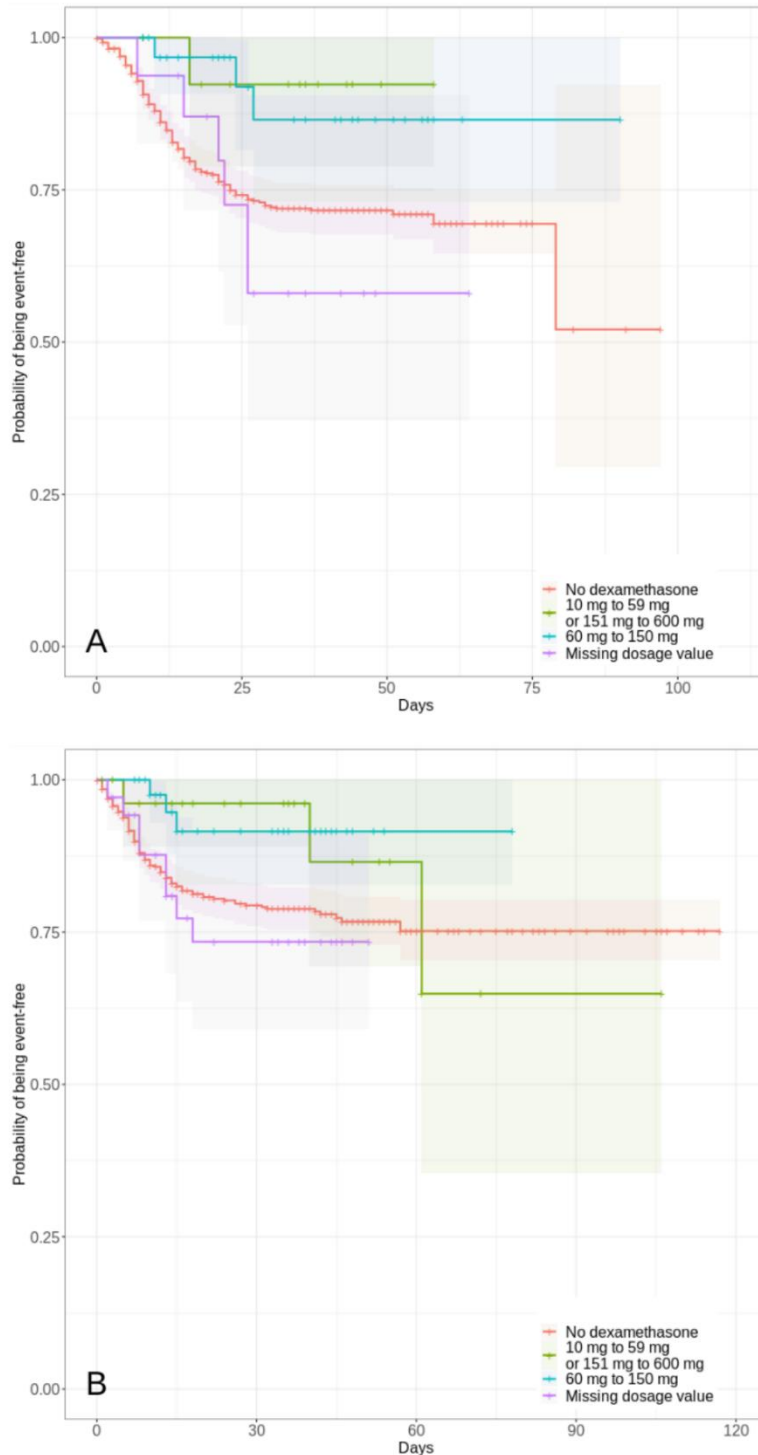

*Note:* The shaded areas represent pointwise 95% confidence intervals.
