# Supplementary material for: Dexamethasone use and Mortality in Hospitalized Patients with Coronavirus Disease 2019: a Multicenter Retrospective Observational Study
Source: bioRxiv or medRxiv preprint supplement (doi:10.1101/2020.10.23.20218172), 2020-10-27
Supplement: Supplementary file [file media-2.pdf]

**eTable 1. Associations of baseline clinical characteristics with the endpoint of death in patients with and without respiratory support (oxygen or intubation).**

|                                                         | Full population | With the end-point event | Without the end-point event | Crude analysis        | Multivariable analysis | Collinearity diagnosis (VIF) |
|---------------------------------------------------------|-----------------|--------------------------|-----------------------------|-----------------------|------------------------|------------------------------|
|                                                         | N (%)           | N (%)                    | N (%)                       | HR (SE) / p-value     | HR (SE) / p-value      |                              |
| <b><i>With respiratory support</i></b>                  | 1,192 (100%)    | 308 (25.8%)              | 884 (74.2%)                 |                       |                        |                              |
| Sex                                                     |                 |                          |                             |                       |                        | 1.02                         |
| <i>Women</i>                                            | 325 (27.3%)     | 78 (25.3%)               | 247 (27.9%)                 | Ref.                  | Ref.                   |                              |
| <i>Men</i>                                              | 867 (72.7%)     | 230 (74.7%)              | 637 (72.1%)                 | 1.08 (0.13) / 0.563   | 1.23 (0.18) / 0.254    |                              |
| Age                                                     |                 |                          |                             |                       |                        | 1.01                         |
| <i>18 to 50 years</i>                                   | 249 (20.9%)     | 32 (10.4%)               | 217 (24.5%)                 | Ref.                  | Ref.                   |                              |
| <i>51 to 70 years</i>                                   | 646 (54.2%)     | 149 (48.4%)              | 497 (56.2%)                 | 1.73 (0.19) / 0.005*  | 1.03 (0.36) / 0.934    |                              |
| <i>More than 70 years</i>                               | 297 (24.9%)     | 127 (41.2%)              | 170 (19.2%)                 | 3.79 (0.20) / <0.001* | 2.92 (0.38) / 0.005*   |                              |
| Obesity <sup>a</sup>                                    |                 |                          |                             |                       |                        | 1.02                         |
| <i>Yes</i>                                              | 345 (28.9%)     | 92 (29.9%)               | 253 (28.6%)                 | 1.04 (0.12) / 0.735   | 0.83 (0.21) / 0.379    |                              |
| <i>No</i>                                               | 847 (71.1%)     | 216 (70.1%)              | 631 (71.4%)                 | Ref.                  | Ref.                   |                              |
| Smoking <sup>b</sup>                                    |                 |                          |                             |                       |                        | 1.01                         |
| <i>Yes</i>                                              | 181 (15.2%)     | 38 (12.3%)               | 143 (16.2%)                 | 0.75 (0.17) / 0.095   | 0.60 (0.35) / 0.142    |                              |
| <i>No</i>                                               | 1011 (84.8%)    | 270 (87.7%)              | 741 (83.8%)                 | Ref.                  | Ref.                   |                              |
| Any medical condition <sup>γ</sup>                      |                 |                          |                             |                       |                        | 1.03                         |
| <i>Yes</i>                                              | 793 (66.5%)     | 257 (83.4%)              | 536 (60.6%)                 | 3.47 (0.15) / <0.001* | 4.35 (0.20) / <0.001*  |                              |
| <i>No</i>                                               | 399 (33.5%)     | 51 (16.6%)               | 348 (39.4%)                 | Ref.                  | Ref.                   |                              |
| Clinical severity of Covid-19 at admission <sup>μ</sup> |                 |                          |                             |                       |                        | 1.02                         |

|                                                           |               |               |               |                        |                        |      |
|-----------------------------------------------------------|---------------|---------------|---------------|------------------------|------------------------|------|
| <i>Yes</i>                                                | 552 (46.3%)   | 147 (47.7%)   | 405 (45.8%)   | 1.21 (0.13) / 0.157    | 1.53 (0.17) / 0.011*   |      |
| <i>No</i>                                                 | 387 (32.5%)   | 89 (28.9%)    | 298 (33.7%)   | Ref.                   | Ref.                   |      |
| <i>Missing</i>                                            | 253 (21.2%)   | 72 (23.4%)    | 181 (20.5%)   | 1.38 (0.16) / 0.041*   | 1.92 (0.23) / 0.004*   |      |
| Biological severity of Covid-19 at admission <sup>κ</sup> |               |               |               |                        |                        | 1.01 |
| <i>Yes</i>                                                | 768 (64.4%)   | 193 (62.7%)   | 575 (65.0%)   | 0.89 (0.13) / 0.390    | 1.06 (0.20) / 0.778    |      |
| <i>No</i>                                                 | 287 (24.1%)   | 79 (25.6%)    | 208 (23.5%)   | Ref.                   | Ref.                   |      |
| <i>Missing</i>                                            | 137 (11.5%)   | 36 (11.7%)    | 101 (11.4%)   | 1.00 (0.20) / 0.998    | 1.20 (0.37) / 0.654    |      |
| <b><i>Without respiratory support</i></b>                 | 11,018 (100%) | 1,100 (10.0%) | 9,918 (90.0%) |                        |                        |      |
| Sex                                                       |               |               |               |                        |                        | 1.03 |
| <i>Women</i>                                              | 5770 (52.4%)  | 450 (40.9%)   | 5320 (53.6%)  | Ref.                   | Ref.                   |      |
| <i>Men</i>                                                | 5248 (47.6%)  | 650 (59.1%)   | 4598 (46.4%)  | 1.50 (0.06) / <0.001*  | 1.14 (0.09) / 0.134    |      |
| Age                                                       |               |               |               |                        |                        | 1.08 |
| <i>18 to 50 years</i>                                     | 4169 (37.8%)  | 19 (1.73%)    | 4150 (41.8%)  | Ref.                   | Ref.                   |      |
| <i>51 to 70 years</i>                                     | 3392 (30.8%)  | 159 (14.5%)   | 3233 (32.6%)  | 8.18 (0.24) / <0.001*  | 4.46 (0.35) / <0.001*  |      |
| <i>More than 70 years</i>                                 | 3457 (31.4%)  | 922 (83.8%)   | 2535 (25.6%)  | 35.71 (0.23) / <0.001* | 21.42 (0.34) / <0.001* |      |
| Obesity <sup>α</sup>                                      |               |               |               |                        |                        | 1.02 |
| <i>Yes</i>                                                | 1301 (11.8%)  | 200 (18.2%)   | 1101 (11.1%)  | 1.36 (0.08) / <0.001*  | 1.09 (0.10) / 0.403    |      |
| <i>No</i>                                                 | 9717 (88.2%)  | 900 (81.8%)   | 8817 (88.9%)  | Ref.                   | Ref.                   |      |
| Smoking <sup>β</sup>                                      |               |               |               |                        |                        | 1.03 |
| <i>Yes</i>                                                | 921 (8.36%)   | 166 (15.1%)   | 755 (7.61%)   | 1.48 (0.08) / <0.001*  | 0.93 (0.10) / 0.485    |      |
| <i>No</i>                                                 | 10097 (91.6%) | 934 (84.9%)   | 9163 (92.4%)  | Ref.                   | Ref.                   |      |
| Any medical condition <sup>γ</sup>                        |               |               |               |                        |                        | 1.14 |
| <i>Yes</i>                                                | 2712 (24.6%)  | 637 (57.9%)   | 2075 (20.9%)  | 4.66 (0.06) / <0.001*  | 3.19 (0.09) / <0.001*  |      |
| <i>No</i>                                                 | 8306 (75.4%)  | 463 (42.1%)   | 7843 (79.1%)  | Ref.                   | Ref.                   |      |

|                                                           |              |             |              |                       |                       |      |
|-----------------------------------------------------------|--------------|-------------|--------------|-----------------------|-----------------------|------|
| Clinical severity of Covid-19 at admission <sup>h</sup>   |              |             |              |                       |                       | 1.13 |
| <i>Yes</i>                                                | 2039 (18.5%) | 480 (43.6%) | 1559 (15.7%) | 2.53 (0.08) / <0.001* | 2.07 (0.11) / <0.001* |      |
| <i>No</i>                                                 | 2801 (25.4%) | 260 (23.6%) | 2541 (25.6%) | Ref.                  | Ref.                  |      |
| <i>Missing</i>                                            | 6178 (56.1%) | 360 (32.7%) | 5818 (58.7%) | 0.75 (0.08) / <0.001* | 1.75 (0.13) / <0.001* |      |
| Biological severity of Covid-19 at admission <sup>k</sup> |              |             |              |                       |                       | 1.14 |
| <i>Yes</i>                                                | 3323 (30.2%) | 670 (60.9%) | 2653 (26.7%) | 2.54 (0.08) / <0.001* | 1.72 (0.10) / <0.001* |      |
| <i>No</i>                                                 | 2925 (26.5%) | 243 (22.1%) | 2682 (27.0%) | Ref.                  | Ref.                  |      |
| <i>Missing</i>                                            | 4770 (43.3%) | 187 (17.0%) | 4583 (46.2%) | 0.61 (0.10) / <0.001* | 1.15 (0.14) / 0.321   |      |

<sup>a</sup> Defined as having a body-mass index higher than 30 kg/m<sup>2</sup> or an International Statistical Classification of Diseases and Related Health Problems (ICD-10) diagnosis code for obesity (E66.0, E66.1, E66.2, E66.8, E66.9).

<sup>b</sup> Current smoking status was self-reported.

<sup>γ</sup> Assessed using ICD-10 diagnosis codes for diabetes mellitus (E11), diseases of the circulatory system (I00-I99), diseases of the respiratory system (J00-J99), neoplasms (C00-D49), and diseases of the blood and blood-forming organs and certain disorders involving the immune mechanism (D5-D8)

<sup>h</sup> Defined as having at least one of the following criteria: respiratory rate > 24 breaths/min or < 12 breaths/min, resting peripheral capillary oxygen saturation in ambient air < 90%, temperature > 40°C, or systolic blood pressure < 100 mm Hg.

<sup>k</sup> Defined as having at least one of the following criteria: high neutrophil-to-lymphocyte ratio, low *lymphocyte-to-C-reactive protein* (both variables were dichotomized at the median of the values observed in the full sample), and plasma *lactate* levels *higher than 2 mmol/L*.

\* p-value is significant (p<0.05).

Abbreviations: HR, hazard ratio; SE, standard error; VIF, variance inflation factor.
