# Supplementary material for: Dexamethasone use and Mortality in Hospitalized Patients with Coronavirus Disease 2019: a Multicenter Retrospective Observational Study
Source: bioRxiv or medRxiv preprint supplement (doi:10.1101/2020.10.23.20218172), 2020-10-27
Supplement: Supplementary file [file media-3.pdf]

**eTable 2. Associations between dexamethasone dosage and the endpoint of death in the full sample and in the matched analytic sample.**

| With oxygen or intubation  |                      |                                         |                                                  |                                                           | Without oxygen or intubation |                     |                                         |                                                  |                                                           |
|----------------------------|----------------------|-----------------------------------------|--------------------------------------------------|-----------------------------------------------------------|------------------------------|---------------------|-----------------------------------------|--------------------------------------------------|-----------------------------------------------------------|
| Dexamethasone total dosage | Crude analysis       | Cox regression adjusted for age and sex | Multivariable (Weighted) Cox regression analysis | Univariate Cox regression in the matched analytic samples | Dexamethasone total dosage   | Crude analysis      | Cox regression adjusted for age and sex | Multivariable (Weighted) Cox regression analysis | Univariate Cox regression in the matched analytic samples |
|                            | HR (SE) / p-value    | HR (SE) / p-value                       | HR (SE) / p-value                                | HR (SE) / p-value                                         |                              | HR (SE) / p-value   | HR (SE) / p-value                       | HR (SE) / p-value                                | HR (SE) / p-value                                         |
| No dexamethasone (n=1,129) | Ref.                 | Ref.                                    | Ref.                                             | Ref.                                                      | No dexamethasone (n=10,910)  | Ref.                | Ref.                                    | Ref.                                             | Ref.                                                      |
| Other dosage (n=14)        | 0.21 (1.00) / 0.117  | 0.21 (1.00) / 0.115                     | 0.24 (1.03) / 0.169                              | 0.24 (1.00) / 0.150                                       | Other dosage (n=18)          | 0.60 (0.58) / 0.376 | 0.57 (0.58) / 0.332                     | 0.23 (0.90) / 0.101                              | 0.50 (0.58) / 0.241                                       |
| 60 mg to 150 mg (n =33)    | 0.28 (0.58) / 0.028* | 0.28 (0.58) / 0.027*                    | 0.24 (0.65) / 0.030*                             | 0.32 (0.58) / 0.048*                                      | 60 mg to 150 mg (n=45)       | 0.37 (0.58) / 0.089 | 0.41 (0.58) / 0.122                     | 0.47 (0.57) / 0.178                              | 0.32 (0.58) / 0.049*                                      |
| Missing (n=16)             | 1.16 (0.41) / 0.723  | 1.22 (0.41) / 0.636                     | 1.10 (0.51) / 0.856                              | 1.32 (0.42) / 0.507                                       | Missing (n=35)               | 1.40 (0.35) / 0.355 | 1.19 (0.36) / 0.618                     | 1.32 (0.31) / 0.361                              | 1.19 (0.36) / 0.634                                       |

\* p-value is significant (p<0.05).

Abbreviations: HR, hazard ratio; SE, standard error.
