# Supplementary material for: Dexamethasone use and Mortality in Hospitalized Patients with Coronavirus Disease 2019: a Multicenter Retrospective Observational Study
Source: bioRxiv or medRxiv preprint supplement (doi:10.1101/2020.10.23.20218172), 2020-10-27
Supplement: Supplementary file [file media-4.pdf]

**eTable 3. Interaction of baseline characteristics with dexamethasone use on the endpoint of death among adult inpatients with COVID-19.**

|                                                           | With respiratory support              | Without respiratory support           |
|-----------------------------------------------------------|---------------------------------------|---------------------------------------|
|                                                           | Multivariable Cox regression analysis | Multivariable Cox regression analysis |
|                                                           | HR (SE) / p-value                     | HR (SE) / p-value                     |
| <i>Characteristics</i>                                    |                                       |                                       |
| Sex                                                       |                                       |                                       |
| Women                                                     | Ref.                                  | Ref.                                  |
| Men                                                       | 1.86 (0.22 – 15.99; 0.573)            | 0.91 (0.18 – 4.57; 0.907)             |
| Age                                                       |                                       |                                       |
| 18 to 50 years                                            | Ref.                                  | Ref.                                  |
| 51 to 70 years                                            | 0.64 (0.11 – 3.66; 0.619)             | NA                                    |
| More than 70 years                                        | 0.24 (0.03 – 1.84; 0.172)             | NA                                    |
| Obesity <sup>a</sup>                                      |                                       |                                       |
| Yes                                                       | 2.54 (0.59 – 11.02; 0.213)            | 3.90 (1.13 – 13.44; 0.031*)           |
| No                                                        | Ref.                                  | Ref.                                  |
| Smoking                                                   |                                       |                                       |
| Yes                                                       | 1.28 (0.12 – 13.51; 0.839)            | 0.22 (0.02 – 2.64; 0.233)             |
| No                                                        | Ref.                                  | Ref.                                  |
| Any medical condition <sup>b</sup>                        |                                       |                                       |
| Yes                                                       | 0.35 (0.08 – 1.62; 0.181)             | 1.11 (0.28 – 4.34; 0.880)             |
| No                                                        | Ref.                                  | Ref.                                  |
| Clinical severity of Covid-19 at admission <sup>h</sup>   |                                       |                                       |
| Yes                                                       | 1.35 (0.30 – 6.05; 0.694)             | 0.30 (0.04 – 2.55; 0.788)             |
| No                                                        | Ref.                                  | Ref.                                  |
| Missing                                                   | NA                                    | 0.46 (0.12 – 1.78; 0.263)             |
| Biological severity of Covid-19 at admission <sup>k</sup> |                                       |                                       |
| Yes                                                       | 0.69 (0.10 – 4.70; 0.701)             | 0.31 (0.09 – 1.01; 0.052)             |
| No                                                        | Ref.                                  | Ref.                                  |
| Missing                                                   | 3.24 (0.30 – 35.00; 0.332)            | 0.35 (0.04 – 3.35; 0.362)             |

<sup>a</sup> Defined as having a body-mass index higher than 30 kg/m<sup>2</sup> or an International Statistical Classification of Diseases and Related Health Problems (ICD-10) diagnosis code for obesity (E66.0, E66.1, E66.2, E66.8, E66.9).

<sup>b</sup> Assessed using ICD-10 codes for diabetes mellitus, diseases of the circulatory system, diseases of the respiratory system, neoplasms, and diseases of the blood and blood-forming organs and certain disorders involving the immune mechanism based on ICD-10 classification.

<sup>h</sup> Defined as having at least one of the following criteria: respiratory rate > 24 breaths/min, oxygen saturation < 92%, temperature ≥ 40°C, and systolic blood pressure < 100 mm Hg.

<sup>k</sup> Defined as having at least one of the following criteria: neutrophil-to-lymphocyte ratio higher than the median in the full sample, lymphocyte-to-C-reactive protein ratio lower than the median in the full sample, and plasma lactate level higher than 2 mmol/L.

\* p-value is significant (p<0.05).
